# Supplementary material for: 1,3-Butadiene, styrene and lymphohaematopoietic cancers among North American synthetic rubber polymer workers: exposure–response analyses
Source: HighWire-hosted journal article supplement (doi:10.1136/oemed-2020-107197), 2021-06-09
Supplement: oemed-2020-107197supp001_data_supplement.pdf [file oemed-2020-107197supp001_data_supplement.pdf]

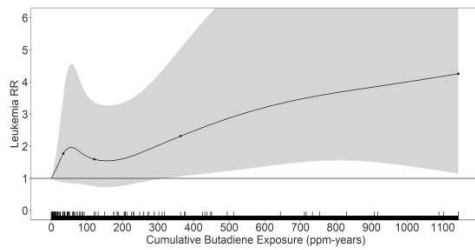

S1a. Butadiene, trimmed ppm-years

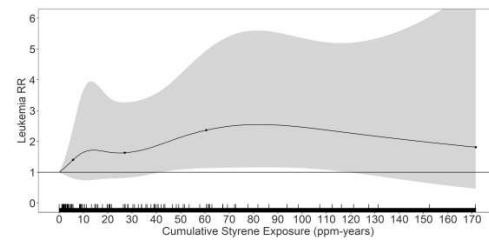

S1b. Styrene, trimmed ppm-years

Figure S1. Restricted cubic splines for trimmed butadiene ppm-years and leukemia (S1a) and trimmed styrene ppm-years and leukemia (S1b). Models used trimmed data (excludes all unexposed person-time and all person-time with ppm-years above the 95<sup>th</sup> percentile of the exposure distribution of leukemia decedents, at 1,144 ppm-years for butadiene and at 171 ppm-years for styrene). Rugs just above the X-axis of each figure depict the frequency of all observations (lower rug) and leukemias (upper rug) at corresponding monomer exposure values. Circles indicate cutpoints for quartiles 2, 3 and 4 and for the 95<sup>th</sup> percentile.

| <b>Table S1</b> Cross-tabulation of cases of each outcome by quartiles of butadiene and styrene ppm-years |                            |           |                          |               |               |       |
|-----------------------------------------------------------------------------------------------------------|----------------------------|-----------|--------------------------|---------------|---------------|-------|
|                                                                                                           | <b>Butadiene ppm-years</b> |           | <b>Styrene ppm-years</b> |               |               |       |
|                                                                                                           |                            | >0-< 5.76 | 5.76-< 27.00             | 27.00-< 60.53 | 60.53-1203.21 | Total |
| <i>All leukemia</i>                                                                                       | 0                          | >0-< 5.76 | 5.76-< 27.00             | 27.00-< 60.53 | 60.53-1203.21 | Total |
| 0                                                                                                         | 23                         | 3         | 2                        | 1             | 0             | 29    |
| >0-< 34.00                                                                                                | 0                          | 17        | 6                        | 3             | 0             | 26    |
| 34.00-< 121.28                                                                                            | 0                          | 7         | 10                       | 7             | 2             | 26    |
| 121.28-< 363.64                                                                                           | 0                          | 0         | 8                        | 10            | 7             | 25    |
| 363.64-7741.41                                                                                            | 0                          | 0         | 1                        | 7             | 18            | 26    |
| Total                                                                                                     | 23                         | 27        | 27                       | 28            | 27            | 132   |
| <i>Lymphoid leukemia</i>                                                                                  | 0                          | >0-< 8.52 | 8.52-< 27.21             | 27.21-< 69.29 | 69.29-1203.21 | Total |
| 0                                                                                                         | 10                         | 1         | 2                        | 0             | 0             | 13    |
| >0-< 44.73                                                                                                | 0                          | 5         | 3                        | 1             | 0             | 9     |
| 44.73-< 213.43                                                                                            | 0                          | 4         | 4                        | 2             | 0             | 10    |
| 213.43-< 376.31                                                                                           | 0                          | 0         | 2                        | 3             | 5             | 10    |
| 376.31-7741.41                                                                                            | 0                          | 0         | 0                        | 4             | 6             | 10    |
| Total                                                                                                     | 10                         | 10        | 11                       | 10            | 11            | 52    |
| <i>Myeloid leukemia</i>                                                                                   | 0                          | >0-< 5.21 | 5.21-< 20.71             | 20.71-< 48.25 | 48.25-340.52  | Total |
| 0                                                                                                         | 11                         | 2         | 0                        | 0             | 1             | 14    |
| >0-< 25.20                                                                                                | 0                          | 7         | 5                        | 1             | 0             | 13    |
| 25.20-< 70.05                                                                                             | 0                          | 5         | 4                        | 5             | 0             | 14    |
| 70.05-< 230.08                                                                                            | 0                          | 0         | 5                        | 5             | 3             | 13    |
| 230.08-2009.71                                                                                            | 0                          | 0         | 0                        | 3             | 10            | 13    |
| Total                                                                                                     | 11                         | 14        | 14                       | 14            | 14            | 67    |
| <i>AML*</i>                                                                                               | 0                          | >0-< 5.21 | 5.21-< 19.73             | 19.73-< 34.00 | 34.00-340.52  | Total |
| 0                                                                                                         | 6                          | 2         | 0                        | 0             | 1             | 9     |
| >0-< 19.14                                                                                                | 0                          | 4         | 4                        | 0             | 0             | 8     |
| 19.14-< 59.19                                                                                             | 0                          | 1         | 3                        | 3             | 1             | 8     |
| 59.19-< 185.63                                                                                            | 0                          | 1         | 1                        | 4             | 2             | 8     |
| 185.63-2009.71                                                                                            | 0                          | 0         | 1                        | 2             | 5             | 8     |
| Total                                                                                                     | 6                          | 8         | 9                        | 9             | 9             | 41    |
| <i>NHL</i>                                                                                                | 0                          | >0-< 5.97 | 5.97-< 23.61             | 23.61-< 59.67 | 59.67-231.34  | Total |
| 0                                                                                                         | 24                         | 5         | 4                        | 0             | 1             | 34    |
| >0-<17.94                                                                                                 | 0                          | 11        | 5                        | 2             | 1             | 19    |
| 17.94-< 117.22                                                                                            | 0                          | 3         | 9                        | 7             | 0             | 19    |
| 117.22-< 334.83                                                                                           | 0                          | 0         | 4                        | 9             | 6             | 19    |
| 334.83-1495.51                                                                                            | 0                          | 2         | 0                        | 3             | 14            | 19    |
| Total                                                                                                     | 24                         | 21        | 22                       | 21            | 22            | 110   |
| <i>Multiple myeloma</i>                                                                                   | 0                          | >0-< 2.80 | 2.80-< 14.67             | 14.67-< 77.99 | 77.99-839.61  | Total |
| 0                                                                                                         | 16                         | 2         | 1                        | 0             | 1             | 20    |
| >0-< 31.42                                                                                                | 0                          | 7         | 3                        | 0             | 0             | 10    |
| 31.42-< 107.78                                                                                            | 0                          | 0         | 6                        | 4             | 0             | 10    |
| 107.78-< 386.04                                                                                           | 1                          | 1         | 1                        | 5             | 2             | 10    |
| 386.04-2397.73                                                                                            | 0                          | 0         | 0                        | 2             | 8             | 10    |
| Total                                                                                                     | 17                         | 10        | 11                       | 11            | 11            | 60    |

**Table S1** Cross-tabulation of cases of each outcome by quartiles of butadiene and styrene ppm-years

| <b>Butadiene ppm-years</b> | <b>Styrene ppm-years</b> |                        |                        |                         |                      | <b>Total</b> |
|----------------------------|--------------------------|------------------------|------------------------|-------------------------|----------------------|--------------|
|                            | <b>0</b>                 | <b>&gt;0–&lt; 4.63</b> | <b>4.63–&lt; 20.74</b> | <b>20.74–&lt; 61.70</b> | <b>61.70–1203.21</b> |              |
| <i>B-cell malignancy</i>   | 0                        |                        |                        |                         |                      |              |
| 0                          | 49                       | 7                      | 7                      | 0                       | 2                    | 65           |
| >0–< 27.04                 | 0                        | 23                     | 8                      | 5                       | 1                    | 37           |
| 27.04–< 124.38             | 0                        | 8                      | 18                     | 11                      | 0                    | 37           |
| 124.38–< 370.89            | 1                        | 0                      | 5                      | 17                      | 14                   | 37           |
| 370.89–7741.41             | 0                        | 3                      | 2                      | 8                       | 24                   | 37           |
| <b>Total</b>               | <b>50</b>                | <b>41</b>              | <b>40</b>              | <b>41</b>               | <b>41</b>            | <b>213</b>   |

\*Abbreviations: AML, acute myeloid leukemia; NHL, non-Hodgkin lymphoma.

**Table S2** Exposure-response analyses of butadiene and lymphohematopoietic cancers: number (N) of cases, adjusted rate ratio (RR) with 95% confidence interval (CI) by exposure quartile (Q), beta-coefficient ( $\beta$ ) with 95% confidence interval (CI) and trend p-value for butadiene ppm-years, reduced models

| Butadiene ppm-years, model*                                                                                                  | All leukemias                                                                          |      |                             | Lymphoid leukemia                                                                                |      |                             | Myeloid leukemia                                                                                          |      |                               |
|------------------------------------------------------------------------------------------------------------------------------|----------------------------------------------------------------------------------------|------|-----------------------------|--------------------------------------------------------------------------------------------------|------|-----------------------------|-----------------------------------------------------------------------------------------------------------|------|-------------------------------|
|                                                                                                                              | N                                                                                      | RR   | 95% CI (S,H) <sup>§</sup>   | N                                                                                                | RR   | 95% CI (S,H) <sup>§</sup>   | N                                                                                                         | RR   | 95% CI (S,H) <sup>§</sup>     |
| Unexposed                                                                                                                    | 29                                                                                     | 1.0  | ref                         | 13                                                                                               | 1.0  | ref                         | 14                                                                                                        | 1.0  | ref                           |
| Q1                                                                                                                           | 26                                                                                     | 1.05 | 0.60 to 1.84                | 9                                                                                                | 0.71 | 0.29 to 1.73                | 13                                                                                                        | 1.16 | 0.53 to 2.54                  |
| Q2                                                                                                                           | 26                                                                                     | 1.36 | 0.76 to 2.43                | 10                                                                                               | 0.84 | 0.34 to 2.09                | 14                                                                                                        | 1.95 | 0.88 to 4.33                  |
| Q3                                                                                                                           | 25                                                                                     | 1.62 | 0.89 to 2.96                | 10                                                                                               | 2.70 | 1.08 to 6.76                | 13                                                                                                        | 1.47 | 0.64 to 3.35                  |
| Q4                                                                                                                           | 26                                                                                     | 2.52 | 1.39 to 4.58                | 10                                                                                               | 1.97 | 0.79 to 4.94                | 13                                                                                                        | 1.72 | 0.74 to 4.00                  |
| $\beta$ [95% CI], trend p-value, AIC <sup>†</sup> , all person-time <sup>‡</sup>                                             | 2.57x10 <sup>-4</sup> [(0.75 to 4.39) x10 <sup>-4</sup> ], p=0.006, AIC=2382 (R)       |      |                             | 4.02x10 <sup>-4</sup> [(1.29 to 6.75) x10 <sup>-4</sup> ], p=0.004, AIC=931 (S,R,P,H)            |      |                             | 1.08x10 <sup>-4</sup> [(-2.82 to 4.99) x10 <sup>-4</sup> ], p=0.586, AIC=1229 (S,P,H)                     |      |                               |
| $\beta$ [95% CI], trend p-value, AIC, exposed person-time <sup>‡</sup>                                                       | 2.41x10 <sup>-4</sup> [(0.63 to 4.18) x10 <sup>-4</sup> ], p=0.008, AIC=1781 (none)    |      |                             | 4.91x10 <sup>-4</sup> [(1.51 to 8.31) x10 <sup>-4</sup> ], p=0.005, AIC=660 (S,R,P) <sup>¶</sup> |      |                             | 0.63x10 <sup>-4</sup> [(-3.50 to 4.76) x10 <sup>-4</sup> ], p=0.766, AIC=924 (none) <sup>**</sup>         |      |                               |
| $\beta$ [95% CI], trend p-value, AIC, exposed person-time $\leq$ 95 <sup>th</sup> percentile at 1,144 ppm-years <sup>‡</sup> | 10.30x10 <sup>-4</sup> [(2.52 to 18.14) x10 <sup>-4</sup> ], p=0.010, AIC=1670 (R,P,H) |      |                             | 15.00x10 <sup>-4</sup> [(4.37 to 25.59) x10 <sup>-4</sup> ], p=0.006, AIC=616 (S) <sup>¶</sup>   |      |                             | -0.16x10 <sup>-4</sup> [(-14.68 to 14.37) x10 <sup>-4</sup> ], p=0.983, AIC=880 (A,Y,R,P,H) <sup>**</sup> |      |                               |
|                                                                                                                              | Non-Hodgkin lymphoma                                                                   |      |                             | Multiple myeloma                                                                                 |      |                             | B-cell malignancy <sup>††</sup>                                                                           |      |                               |
|                                                                                                                              | N                                                                                      | RR   | 95% CI (S,P,H) <sup>§</sup> | N                                                                                                | RR   | 95% CI (S,P,H) <sup>§</sup> | N                                                                                                         | RR   | 95% CI (S,R,P,H) <sup>§</sup> |
| Unexposed                                                                                                                    | 34                                                                                     | 1.0  | ref                         | 20                                                                                               | 1.0  | ref                         | 65                                                                                                        | 1.0  | ref                           |
| Q1                                                                                                                           | 19                                                                                     | 0.91 | 0.51 to 1.64                | 10                                                                                               | 0.60 | 0.27 to 1.33                | 37                                                                                                        | 0.76 | 0.50 to 1.17                  |
| Q2                                                                                                                           | 19                                                                                     | 0.57 | 0.31 to 1.05                | 10                                                                                               | 0.70 | 0.31 to 1.61                | 37                                                                                                        | 0.70 | 0.45 to 1.08                  |
| Q3                                                                                                                           | 19                                                                                     | 0.93 | 0.50 to 1.72                | 10                                                                                               | 0.67 | 0.29 to 1.57                | 37                                                                                                        | 0.95 | 0.60 to 1.48                  |
| Q4                                                                                                                           | 19                                                                                     | 1.29 | 0.69 to 2.40                | 10                                                                                               | 1.17 | 0.51 to 2.73                | 37                                                                                                        | 1.38 | 0.88 to 2.18                  |
| $\beta$ [95% CI], trend p-value, AIC, all person-time <sup>‡</sup>                                                           | 0.25x10 <sup>-4</sup> [(-3.62 to 4.13) x10 <sup>-4</sup> ], p=0.898, AIC=1970 (P,H)    |      |                             | -0.82x10 <sup>-4</sup> [(-5.08 to 3.45) x10 <sup>-4</sup> ], p=0.707, AIC=1056 (A,Y,S,R,P,H)     |      |                             | 1.17x10 <sup>-4</sup> [(-0.73 to 3.06) x10 <sup>-4</sup> ], p=0.228, AIC=3782 (S,R,P,H)                   |      |                               |
| $\beta$ [95% CI], trend p-value, AIC, exposed person-time <sup>‡</sup>                                                       | 1.55x10 <sup>-4</sup> [(-2.24 to 5.34) x10 <sup>-4</sup> ], p=0.424, AIC=1312 (P)      |      |                             | -0.34x10 <sup>-4</sup> [(-4.41 to 3.73) x10 <sup>-4</sup> ], p=0.869, AIC=664 (S,R,H)            |      |                             | 1.96x10 <sup>-4</sup> [(-0.06 to 3.98) x10 <sup>-4</sup> ], p=0.058, AIC=2514 (S,R,P)                     |      |                               |
| $\beta$ [95% CI], trend p-value, AIC, exposed person-time $\leq$ 95 <sup>th</sup> percentile at 1,083 ppm-years <sup>‡</sup> | 14.10x10 <sup>-4</sup> [(5.09 to 23.02)x10 <sup>-4</sup> ], p=0.002, AIC=1281 (S,P,H)  |      |                             | 6.13x10 <sup>-4</sup> [(-6.86 to 19.12) x10 <sup>-4</sup> ], p=0.355, AIC=631 (S,R,P)            |      |                             | 11.00x10 <sup>-4</sup> [(4.45 to 17.62)x10 <sup>-4</sup> ], p=0.001, AIC=2379 (P,H)                       |      |                               |

---

\*Models used attained age as of each day of follow-up as the time scale. See supplemental Table S1 for outcome-specific ranges of butadiene ppm-years by quartile.

†AIC, Akaike information criterion.

‡Covariates for each model are listed: A, age at hire; Y, year of hire; R, race; S, sex; P, plant; H, ever hourly.

§Covariates for the analysis of RRs by monomer exposure quartile.

¶Restricted to ever hourly due to lack of events among never hourly.

\*\*Restricted to men due to lack of events among women.

††B-cell malignancy included lymphoid leukemia, non-Hodgkin lymphoma and multiple myeloma.

**Table S3** Exposure-response analyses of styrene ppm-years and lymphohematopoietic cancers: number (N) of cases, adjusted rate ratio (RR) with 95% confidence interval (CI) by exposure quartile (Q), beta-coefficient ( $\beta$ ) with 95% confidence interval (CI) and trend p-value for styrene ppm-years, reduced models

| Styrene ppm-years, model*                                                                                                  | All leukemias                                                                          |      |                               | Lymphoid leukemia                                                                                |      |                             | Myeloid leukemia                                                                           |      |                               |
|----------------------------------------------------------------------------------------------------------------------------|----------------------------------------------------------------------------------------|------|-------------------------------|--------------------------------------------------------------------------------------------------|------|-----------------------------|--------------------------------------------------------------------------------------------|------|-------------------------------|
|                                                                                                                            | N                                                                                      | RR   | 95% CI (S,R,P,H) <sup>§</sup> | N                                                                                                | RR   | 95% CI (S,R,H) <sup>§</sup> | N                                                                                          | RR   | 95% CI (S,P,H) <sup>§</sup>   |
| Unexposed                                                                                                                  | 23                                                                                     | 1.0  | ref                           | 10                                                                                               | 1.0  | ref                         | 11                                                                                         | 1.0  | ref                           |
| Q1                                                                                                                         | 27                                                                                     | 1.13 | 0.61 to 2.08                  | 10                                                                                               | 0.76 | 0.29 to 2.00                | 14                                                                                         | 1.26 | 0.54 to 2.98                  |
| Q2                                                                                                                         | 27                                                                                     | 1.13 | 0.60 to 2.13                  | 11                                                                                               | 1.26 | 0.47 to 3.34                | 14                                                                                         | 1.36 | 0.56 to 3.29                  |
| Q3                                                                                                                         | 28                                                                                     | 1.84 | 0.97 to 3.52                  | 10                                                                                               | 1.20 | 0.44 to 3.31                | 14                                                                                         | 1.84 | 0.74 to 4.54                  |
| Q4                                                                                                                         | 27                                                                                     | 2.01 | 1.03 to 3.89                  | 11                                                                                               | 1.70 | 0.62 to 4.67                | 14                                                                                         | 1.78 | 0.71 to 4.49                  |
| $\beta$ [95% CI], trend p-value, AIC <sup>†</sup> , all person-time <sup>‡</sup>                                           | 1.05x10 <sup>-3</sup> [(-0.09 to 2.18) x10 <sup>-3</sup> ], p=0.070, AIC=2378 (H)      |      |                               | 1.58x10 <sup>-3</sup> [(0.25 to 2.91) x10 <sup>-3</sup> ], p=0.020, AIC=926 (H)                  |      |                             | -2.32x10 <sup>-4</sup> [(-31.29 to 26.66) x10 <sup>-4</sup> ], p=0.876, AIC=1223 (S,R,H)   |      |                               |
| $\beta$ [95% CI], trend p-value, AIC, exposed person-time <sup>‡</sup>                                                     | 0.86x10 <sup>-3</sup> [(-0.34 to 2.05) x10 <sup>-3</sup> ], p=0.159, AIC=1901 (S,H)    |      |                               | 1.12x10 <sup>-3</sup> [(-0.44 to 2.69) x10 <sup>-3</sup> ], p=0.160, AIC=718 (R) <sup>¶</sup>    |      |                             | -3.68x10 <sup>-4</sup> [(-33.31 to 25.96) x10 <sup>-4</sup> ], p=0.808, AIC=996 (H)        |      |                               |
| $\beta$ [95% CI], trend p-value, AIC, exposed person-time $\leq$ 95 <sup>th</sup> percentile at 171 ppm-years <sup>‡</sup> | 3.98x10 <sup>-3</sup> [(-1.13 to 9.10) x10 <sup>-3</sup> ], p=0.127, AIC=1787 (S,R,H)  |      |                               | 3.61x10 <sup>-3</sup> [(-4.31 to 11.54) x10 <sup>-3</sup> ], p=0.371, AIC=680 (S,R) <sup>¶</sup> |      |                             | 28.10x10 <sup>-4</sup> [(-47.58 to 103.76) x10 <sup>-4</sup> ], p=0.467, AIC=951 (S,H)     |      |                               |
|                                                                                                                            | Non-Hodgkin lymphoma                                                                   |      |                               | Multiple myeloma                                                                                 |      |                             | B-cell malignancy <sup>††</sup>                                                            |      |                               |
|                                                                                                                            | N                                                                                      | RR   | 95% CI (S,P,H) <sup>§</sup>   | N                                                                                                | RR   | 95% CI (S,P,H) <sup>§</sup> | N                                                                                          | RR   | 95% CI (S,R,P,H) <sup>§</sup> |
| Unexposed                                                                                                                  | 24                                                                                     | 1.0  | ref                           | 17                                                                                               | 1.0  | ref                         | 50                                                                                         | 1.0  | ref                           |
| Q1                                                                                                                         | 21                                                                                     | 0.83 | 0.43 to 1.57                  | 10                                                                                               | 0.93 | 0.41 to 2.13                | 41                                                                                         | 0.91 | 0.58 to 1.42                  |
| Q2                                                                                                                         | 22                                                                                     | 1.03 | 0.53 to 2.00                  | 11                                                                                               | 0.61 | 0.27 to 1.39                | 40                                                                                         | 0.84 | 0.52 to 1.34                  |
| Q3                                                                                                                         | 21                                                                                     | 1.11 | 0.56 to 2.20                  | 11                                                                                               | 0.44 | 0.19 to 1.02                | 41                                                                                         | 0.87 | 0.54 to 1.40                  |
| Q4                                                                                                                         | 22                                                                                     | 1.50 | 0.76 to 2.96                  | 11                                                                                               | 0.93 | 0.38 to 2.25                | 41                                                                                         | 1.20 | 0.73 to 1.95                  |
| $\beta$ [95% CI], trend p-value, AIC, all person-time <sup>‡</sup>                                                         | -0.23x10 <sup>-3</sup> [(-2.54 to 2.07) x10 <sup>-3</sup> ], p=0.842, AIC=1970 (P,H)   |      |                               | 0.15x10 <sup>-3</sup> [(-1.54 to 1.85) x10 <sup>-3</sup> ], p=0.858, AIC=1056 (A,Y,S,R,P,H)      |      |                             | 5.68x10 <sup>-4</sup> [(-4.67 to 16.03) x10 <sup>-4</sup> ], p=0.282, AIC=3782 (S,R,P,H)   |      |                               |
| $\beta$ [95% CI], trend p-value, AIC, exposed person-time <sup>‡</sup>                                                     | -0.15x10 <sup>-3</sup> [(-2.52 to 2.22) x10 <sup>-3</sup> ], p=0.902, AIC=1501 (S,R,P) |      |                               | 0.31x10 <sup>-3</sup> [(-1.44 to 2.05) x10 <sup>-3</sup> ], p=0.731, AIC=730 (A,Y,S,R,P,H)       |      |                             | 5.54x10 <sup>-4</sup> [(-5.08 to 16.16) x10 <sup>-4</sup> ], p=0.307, AIC=2806 (R,P,H)     |      |                               |
| $\beta$ [95% CI], trend p-value, AIC, exposed person-time $\leq$ 95 <sup>th</sup> percentile at 213 ppm-years <sup>‡</sup> | 4.20x10 <sup>-3</sup> [(-0.52 to 8.91) x10 <sup>-3</sup> ], p=0.081, AIC=1455 (S,P)    |      |                               | -1.57x10 <sup>-3</sup> [(-9.58 to 6.44) x10 <sup>-3</sup> ], p=0.700, AIC=640 (R,P,H)            |      |                             | 17.10x10 <sup>-4</sup> [(-20.78 to 54.88) x10 <sup>-4</sup> ], p=0.377, AIC=2635 (S,R,P,H) |      |                               |

---

\*Models used attained age as of each day of follow-up as the time scale. See supplemental Table S1 for outcome-specific ranges of styrene ppm-years by quartile.

†AIC, Akaike information criterion.

‡Covariates for each model are listed: A, age at hire; Y, year of hire; R, race; S, sex; P, plant; H, ever hourly.

§Covariates for the analysis of RRs by monomer exposure quartile.

¶Restricted to ever hourly due to lack of events among never hourly.

††B-cell malignancies included lymphoid leukemia, non-Hodgkin lymphoma and multiple myeloma.

**Table S4** Exposure-response analyses of butadiene or styrene ppm-years and acute myeloid leukemia: number (N) of cases, adjusted rate ratio (RR) with 95% confidence interval (CI) by exposure quartile, beta-coefficient ( $\beta$ ) with 95% confidence interval (CI) and trend p-value, reduced model

| Model*                                                                                                                                                       | N | Butadiene                                                                                        |                             | N | Styrene                                                                                |                         |
|--------------------------------------------------------------------------------------------------------------------------------------------------------------|---|--------------------------------------------------------------------------------------------------|-----------------------------|---|----------------------------------------------------------------------------------------|-------------------------|
|                                                                                                                                                              |   | RR                                                                                               | 95% CI (S,P,H) <sup>§</sup> |   | RR                                                                                     | 95% CI (R) <sup>§</sup> |
| Quartile <sup>†</sup>                                                                                                                                        |   |                                                                                                  |                             |   |                                                                                        |                         |
| Unexposed                                                                                                                                                    | 9 | 1.0                                                                                              | ref                         | 6 | 1.0                                                                                    | ref                     |
| Q1                                                                                                                                                           | 8 | 1.36                                                                                             | 0.50 to 3.69                | 8 | 1.76                                                                                   | 0.61 to 5.09            |
| Q2                                                                                                                                                           | 8 | 1.93                                                                                             | 0.69 to 5.36                | 9 | 2.39                                                                                   | 0.85 to 6.72            |
| Q3                                                                                                                                                           | 8 | 1.69                                                                                             | 0.59 to 4.83                | 9 | 4.66                                                                                   | 1.66 to 13.12           |
| Q4                                                                                                                                                           | 8 | 1.70                                                                                             | 0.58 to 4.99                | 9 | 2.03                                                                                   | 0.71 to 5.79            |
| Trend:                                                                                                                                                       |   |                                                                                                  |                             |   |                                                                                        |                         |
| $\beta$ [95% CI], trend p-value, AIC <sup>†</sup> , all person-time <sup>‡</sup>                                                                             |   | $-1.02 \times 10^{-4}$ , [(-9.18 to 7.15) $\times 10^{-4}$ ], p=0.807, AIC=750 (R,P,H)           |                             |   | $-6.10 \times 10^{-4}$ [(-51.00 to 38.41) $\times 10^{-4}$ ], p=0.788, AIC=750 (R,P,H) |                         |
| $\beta$ [95% CI], trend p-value, AIC, exposed person-time <sup>‡</sup>                                                                                       |   | $-2.33 \times 10^{-4}$ , [(-13.01 to 8.34) $\times 10^{-4}$ ], p=0.669, AIC=555 (P) <sup>¶</sup> |                             |   | $-1.12 \times 10^{-3}$ [(-6.57 to 4.34) $\times 10^{-3}$ ], p=0.688, AIC=618 (S,P)     |                         |
| $\beta$ [95% CI], trend p-value, AIC, exposed person-time $\leq 95^{\text{th}}$ percentile at 1,144 ppm-years for butadiene and 171 for styrene <sup>‡</sup> |   | $-1.39 \times 10^{-3}$ [(-3.92 to 1.14) $\times 10^{-3}$ ], p=0.282, AIC=535 (P,H) <sup>¶</sup>  |                             |   | $-3.01 \times 10^{-3}$ [(-14.95 to 8.94) $\times 10^{-3}$ ], p=0.622, AIC=600 (R,P,H)  |                         |

\*Models used attained age as of each day of follow-up as the time scale. See supplemental Table S1 for outcome-specific ranges of butadiene ppm-years by quartile.

<sup>†</sup>AIC, Akaike information criterion.

<sup>‡</sup>Covariates for each model are listed: A, age at hire; Y, year of hire; R, race; S, sex; P, plant; H, ever hourly.

<sup>§</sup>Covariates for the analysis of RRs by monomer exposure quartile.

<sup>¶</sup>Restricted to men due to lack of events among women.



**Table S5** Adjusted\* beta-coefficient ( $\beta$ ) with 95% confidence interval (CI) and trend p-value for the relation between butadiene or styrene ppm-years, lagged 10 or 20 years, and lymphohematopoietic cancers (LHC), all person-time, reduced models

| Monomer, Form of LHC (covariates) | ppm-years, lagged 10 years            |                                    |               |      | ppm-years, lagged 20 years            |                                    |               |      |
|-----------------------------------|---------------------------------------|------------------------------------|---------------|------|---------------------------------------|------------------------------------|---------------|------|
|                                   | $\beta$                               | 95% CI                             | Trend p-value | AIC† | $\beta$                               | 95% CI                             | Trend p-value | AIC  |
| <i>Butadiene</i>                  |                                       |                                    |               |      |                                       |                                    |               |      |
| All leukemia (Covariates)         | 2.55x10 <sup>-4</sup> (R)             | (0.59 to 4.51)x10 <sup>-4</sup>    | 0.011         | 2335 | 2.66x10 <sup>-4</sup> (S,R,P)         | (0.05 to 5.26)x10 <sup>-4</sup>    | 0.045         | 2116 |
| Lymphoid leukemia (Covariates)    | 3.91x10 <sup>-4</sup> (S,R,P,H)       | (1.00 to 6.82)x10 <sup>-4</sup>    | 0.008         | 929  | 3.00x10 <sup>-4</sup> (S)             | (-0.03 to 6.04)x10 <sup>-4</sup>   | 0.052         | 861  |
| Myeloid leukemia (Covariates)     | 1.13x10 <sup>-4</sup> (S, H)          | (-3.02 to 5.28)x10 <sup>-4</sup>   | 0.594         | 1176 | 2.17x10 <sup>-4</sup> (R,P,H)         | (-2.69 to 7.03)x10 <sup>-4</sup>   | 0.381         | 1057 |
| AML§ (Covariates)                 | -0.69x10 <sup>-4</sup> (S,H)          | (-9.06 to 7.68)x10 <sup>-4</sup>   | 0.872         | 714  | -0.14x10 <sup>-4</sup> (A, Y,S,R,P,H) | (-8.85 to 8.57)x10 <sup>-4</sup>   | 0.975         | 641  |
| NHL§ (Covariates)                 | 1.00x10 <sup>-5</sup> (P, H)          | (-42.51 to 44.51)x10 <sup>-5</sup> | 0.964         | 1966 | -6.18x10 <sup>-5</sup> (A, Y,S,R,P,H) | (-67.04 to 54.67)x10 <sup>-5</sup> | 0.842         | 1876 |
| Multiple myeloma (Covariates)     | -7.54x10 <sup>-5</sup> (A, Y,S,R,P,H) | (-52.81 to 37.74)x10 <sup>-5</sup> | 0.744         | 1054 | -8.97x10 <sup>-5</sup> (R, P, H)      | (-62.51 to 44.57)x10 <sup>-5</sup> | 0.743         | 951  |
| B-cell malignancy (Covariates)    | 1.13x10 <sup>-4</sup> (S,R,P,H)       | (-0.94 to 3.20)x10 <sup>-4</sup>   | 0.286         | 3775 | 0.67x10 <sup>-4</sup> (S,R,P,H)       | (-2.00 to 3.33)x10 <sup>-4</sup>   | 0.624         | 3513 |
| <i>Styrene</i>                    |                                       |                                    |               |      |                                       |                                    |               |      |
| All leukemia (Covariates)         | 1.02x10 <sup>-3</sup> (S,H)           | (-0.24 to 2.28)x10 <sup>-3</sup>   | 0.112         | 2328 | 0.97x10 <sup>-3</sup> (S,H)           | (-0.63 to 2.57)x10 <sup>-3</sup>   | 0.233         | 2114 |
| Lymphoid leukemia (Covariates)    | 1.65x10 <sup>-3</sup> (H)             | (0.19 to 3.10)x10 <sup>-3</sup>    | 0.027         | 924  | 1.52x10 <sup>-3</sup> (S,R,P,H)       | (-0.62 to 3.66)x10 <sup>-3</sup>   | 0.163         | 865  |

**Table S5** Adjusted\* beta-coefficient ( $\beta$ ) with 95% confidence interval (CI) and trend p-value for the relation between butadiene or styrene ppm-years, lagged 10 or 20 years, and lymphohematopoietic cancers (LHC), all person-time, reduced models

| Monomer, Form of LHC (covariates) | ppm-years, lagged 10 years             |                                             |               |      | ppm-years, lagged 20 years              |                                               |               |      |
|-----------------------------------|----------------------------------------|---------------------------------------------|---------------|------|-----------------------------------------|-----------------------------------------------|---------------|------|
|                                   | $\beta$                                | 95% CI                                      | Trend p-value | AIC† | $\beta$                                 | 95% CI                                        | Trend p-value | AIC  |
| Myeloid leukemia (Covariates)     | $-4.20 \times 10^{-4}$<br>(S,R)        | $(-37.30 \text{ to } 28.90) \times 10^{-4}$ | 0.804         | 1176 | $-3.34 \times 10^{-4}$<br>(S,P,H)       | $(-44.92 \text{ to } 38.25) \times 10^{-4}$   | 0.875         | 1052 |
| AML§ (Covariates)                 | $-4.01 \times 10^{-4}$<br>(S,H)        | $(-47.21 \text{ to } 39.19) \times 10^{-4}$ | 0.856         | 714  | $-2.69 \times 10^{-4}$<br>(A)           | $(-51.28 \text{ to } 45.91) \times 10^{-4}$   | 0.914         | 633  |
| NHL§ (Covariates)                 | $-3.14 \times 10^{-4}$<br>(P,H)        | $(-28.65 \text{ to } 22.36) \times 10^{-4}$ | 0.809         | 1966 | $-7.18 \times 10^{-4}$<br>(S)           | $(-38.34 \text{ to } 23.97) \times 10^{-4}$   | 0.651         | 1868 |
| Multiple myeloma (Covariates)     | $1.05 \times 10^{-4}$<br>(A,Y,S,R,P,H) | $(-17.61 \text{ to } 19.70) \times 10^{-4}$ | 0.913         | 1054 | $-5.22 \times 10^{-5}$<br>(A,Y,S,R,P,H) | $(-239.49 \text{ to } 229.05) \times 10^{-5}$ | 0.965         | 955  |
| B-cell malignancy (Covariates)    | $5.39 \times 10^{-4}$<br>(S,R,P,H)     | $(-5.96 \text{ to } 16.74) \times 10^{-4}$  | 0.352         | 3775 | $3.06 \times 10^{-4}$<br>(S,R,P,H)      | $(-11.43 \text{ to } 17.55) \times 10^{-4}$   | 0.679         | 3513 |

\*Cox regression analyses used time-dependent age as the time scale. Covariates for each model are listed in parentheses: A, age at hire; Y, year of hire; R, race; S, sex; P, plant; H, ever hourly.

†AIC, Akaike information criterion.

§Abbreviations: AML, acute myeloid leukemia; NHL, non-Hodgkin lymphoma.
